# Supplementary material for: Mutation at a distance caused by homopolymeric guanine repeats in Saccharomyces cerevisiae
Source: PubMed Central journal article supplement — Sci Adv. 2016 May 27;2(5):e1501033. doi: 10.1126/sciadv.1501033 (PMC4928981; doi:10.1126/sciadv.1501033), 2016-05-27
Supplement: 1501033_SM.pdf [file 1501033_SM.pdf]

## Supplementary Materials for

### **Mutation at a distance caused by homopolymeric guanine repeats in *Saccharomyces cerevisiae***

Michael J. McDonald, Yen-Hsin Yu, Jheng-Fen Guo, Shin Yen Chong, Cheng-Fu Kao, Jun-Yi Leu

Published 27 May 2016, *Sci. Adv.* **2**, e1501033 (2016)

DOI: 10.1126/sciadv.1501033

#### **This PDF file includes:**

- fig. S1. Expansion of the polyguanine repeat ( $G_{14}$  to  $G_{15}$ ) reduces the Ura3 protein abundance but not the mRNA level.
- fig. S2.  $G_{11}$  to  $G_{14}$  sequences do not stop DNA polymerase from synthesizing DNA, whereas G-quadruplex does.
- Legend for table S1
- table S2. Chromosome insertion position and replication timing for engineered  $G_{14}$ -*URA* inserts.
- References (66, 67)

#### **Other Supplementary Material for this manuscript includes the following:**

(available at [advances.sciencemag.org/cgi/content/full/2/5/e1501033/DC1](http://advances.sciencemag.org/cgi/content/full/2/5/e1501033/DC1))

- table S1 (Microsoft Excel format). Summary table of 318 sequenced *ura3* mutants from  $G_0$ ,  $G_{14}$ -*ORF*, and  $G_{14}$ -*repeat* strains.

## Supplementary Materials

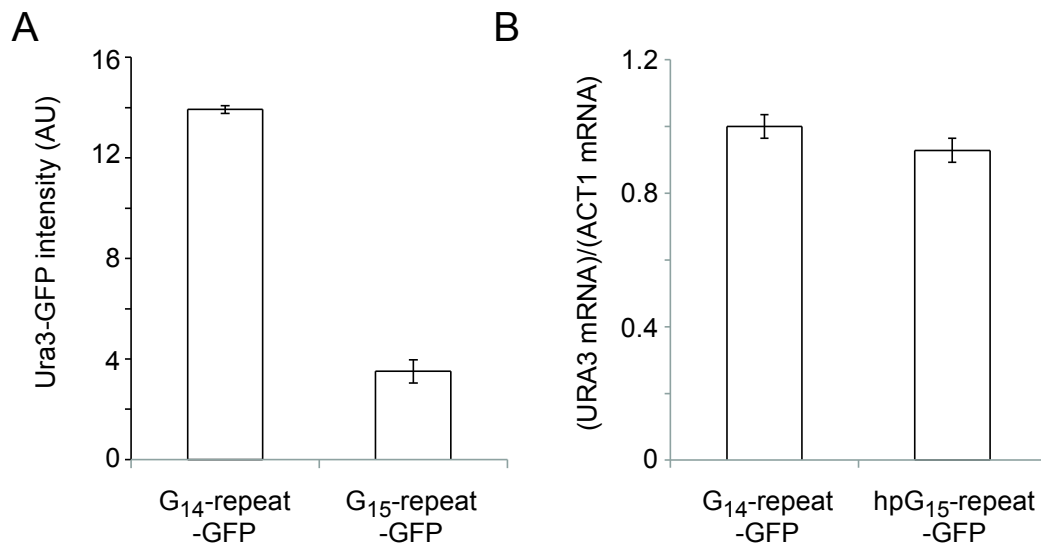

**fig. S1. Expansion of the polyguanine repeat (G<sub>14</sub> to G<sub>15</sub>) reduces the Ura3 protein abundance but not the mRNA level.** (A) The *URA3* gene was tagged with GFP in the G<sub>14</sub>-repeat and G<sub>15</sub>-repeat strains. Ura3-GFP intensity was used to represent the protein level and measured using the fluorescence activated cell sorter. (B) mRNA levels were measured using quantitative PCR.

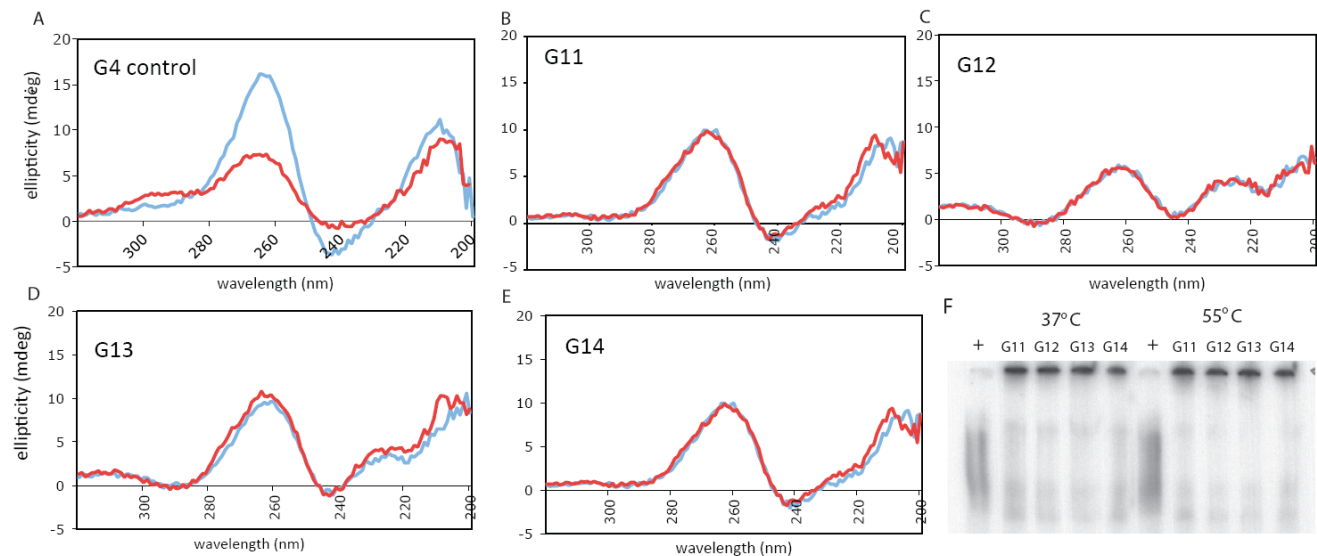

**fig. S2. G<sub>11</sub> to G<sub>14</sub> sequences do not stop DNA polymerase from synthesizing DNA, whereas G-quadruplex does.** (A-E) We analyzed the structures formed by G<sub>11</sub>, G<sub>12</sub>, G<sub>13</sub> and G<sub>14</sub> oligos incubated in the presence of two ions, K<sup>+</sup> and Na<sup>+</sup>. Incubating potential G-quadruplex forming oligos in the presence of either Na<sup>+</sup> or K<sup>+</sup> ions leads to the formation of different structures which can be detected by circular dichroism. K<sup>+</sup> is the preferred ion and

leads to conformationally distinct, stable structures with higher peaks [66, 67]. The peaks observed for the control G-quadruplex structure showed a distinct increase in stability in the presence of  $K^+$  ions compared to  $Na^+$ , recapitulating the results of previous work using this same G-quadruplex [50]. However, the  $G_{11-14}$  sequences all showed a lesser peak than the control G-quadruplex, showing no consistent differences between different lengths of G ( $G_{11}$  formed just as high a peak as  $G_{14}$ ), and  $K^+$  ions did not induce a different or more stable structure compared to  $Na^+$  ions. These combined results suggest that G-quadruplexes are not the causative agent of  $G_{13+}$  induced mutagenesis. F, DNA polymerase stop assays were performed on templates containing either a known G-quadruplex forming sequence or homopolymeric G repeats of 11-14 nucleotides. The G-quadruplex forming sequence acts a positive control (lanes labeled "+"), showing that G-quadruplex formation blocks DNA synthesis in this assay. The templates containing  $G_{11-14}$  were synthesized across, supporting that these sequences do not form G-quadruplex structures. The assay was carried out at  $37^\circ C$  and  $55^\circ C$  to test for potential heat lability of structures.

**table S1.** Summary table of 318 sequenced *ura3* mutants from *G<sub>0</sub>*, *G<sub>14</sub>-ORF*, and *G<sub>14</sub>-Repeat* strains.

**table S2.** Chromosome insertion position and replication timing for engineered *G<sub>14</sub>-URA* inserts.

| <b>Gene</b> | <b>Chr.</b> | <b>Position</b> | <b>Trep<br/>(min)</b> | <b>Direction</b>    |
|-------------|-------------|-----------------|-----------------------|---------------------|
| YLR090W     | XII         | 320701→322080   | 38                    | against replication |
| YLR093C     | XII         | 326513→327415   | 36                    | with replication    |
| YLR098C     | XII         | 337527→339473   | 32                    | with replication    |
| YLR108C     | XII         | 366667→368124   | 18                    | against replication |
| YOLO25W     | XV          | 274957→276939   | 12                    | with replication    |
| YORO32C     | XV          | 389771→391075   | 36                    | against replication |
